# Supplementary material for: Lignin biosynthesis in wheat (Triticum aestivum L.): its response to waterlogging and association with hormonal levels
Source: PubMed Central journal article supplement (PMC4727291; doi:10.1186/s12870-016-0717-4), 2016-01-25
Supplement: 12870_2016_717_MOESM1_ESM.pdf [file 12870_2016_717_MOESM1_ESM.pdf]

**Table S1.** Primer sequences used for qPCR assays of specific lignin biosynthetic genes<sup>a</sup>

| Genes        | Type    | Primer (5' to 3')       |
|--------------|---------|-------------------------|
| <i>PAL1</i>  | Forward | GCTTGGCAAAGACGGATGTC    |
|              | Reverse | AGCGCCAACCTACCCATTGAT   |
| <i>PAL6</i>  | Forward | CTCAAGCTCATGTCCTCCACA   |
|              | Reverse | TCAGCACCTTCTTCGACACC    |
| <i>C3H2</i>  | Forward | AAGCCACTGGTTGTCAGGAG    |
|              | Reverse | TGAACTCCTGCCCTTCTTCG    |
| <i>C3H3</i>  | Forward | AAGATCATGGAGGAGCACGC    |
|              | Reverse | CGGTGATCATGTCCCAGAGG    |
| <i>CCR2</i>  | Forward | GAAACAGCGCGGTTACGTT     |
|              | Reverse | AGGAATGCTGGCAACAAACCC   |
| <i>CCR6</i>  | Forward | TGACTGACGATCCAGAGCAG    |
|              | Reverse | GCAGAATTCAAGGTCGCTCC    |
| <i>COMT1</i> | Forward | GGTTCGCCGCCATGAAGACTA   |
|              | Reverse | CAGGTGGATGCATCAGAGAGGTA |
| <i>COMT2</i> | Forward | GTCCGCCGATCTGAGAATCTTC  |
|              | Reverse | CGACGACACAACCAGTAGAG    |
| <i>COMT3</i> | Forward | GAGTATCATGGCACGGACCC    |
|              | Reverse | ACGCCATTGAAGCCCTTGTA    |
| <i>CAD1</i>  | Forward | TTACCTACCAGCTCCAGCCA    |
|              | Reverse | TCTGGAATTGCACGCACCAA    |

<sup>a</sup>Primer sequences were designed for the newly identified candidate lignin biosynthetic genes or redesigned in cases where previously reported primers [3] do not exhibit target gene specificity.
