# Supplementary material for: Lignin biosynthesis in wheat (Triticum aestivum L.): its response to waterlogging and association with hormonal levels
Source: PubMed Central journal article supplement (PMC4727291; doi:10.1186/s12870-016-0717-4), 2016-01-25
Supplement: 12870_2016_717_MOESM6_ESM.pdf [file 12870_2016_717_MOESM6_ESM.pdf]

**Table S2.** Relative transcript levels of candidate lignin biosynthesis genes in different tissues of wheat<sup>w</sup>

| Gene            | FB                       | FS           | PE            | IN-1         | IN-2&3        | IN-4         |
|-----------------|--------------------------|--------------|---------------|--------------|---------------|--------------|
| <i>PAL1</i>     | 0.34 ±0.08 <sup>xy</sup> | 0.02 ±0.00c  | 0.01 ±0.00d   | 0.25 ±0.06b  | 2.18 ±0.25a   | 2.40 ±0.29a  |
| <i>PAL2</i>     | 0.26 ±0.05cd             | 0.16 ±0.02d  | 0.36 ±0.10c   | 0.75 ±0.13b  | 2.76 ±0.22a   | 3.22 ±0.23a  |
| <i>PAL3</i>     | 0.26 ±0.03c              | 0.12 ±0.01d  | 0.16 ±0.03d   | 0.32 ±0.05c  | 1.48 ±0.16b   | 2.35 ±0.30a  |
| <i>PAL4</i>     | 0.54 ±0.03d              | 1.58 ±0.16c  | 7.92 ±0.60a   | 6.51 ±0.70b  | 6.95 ±1.07ab  | 7.28 ±0.76a  |
| <i>PAL5</i>     | 0.32 ±0.03e              | 0.28 ±0.01e  | 0.49 ±0.08d   | 0.89 ±0.04c  | 3.80 ±0.44b   | 5.71 ±0.65a  |
| <i>PAL6</i>     | 0.83 ±0.07d              | 9.05 ±0.80c  | 89.25 ±19.53a | 54.50 ±6.76b | 54.57 ±11.98b | 33.66 ±6.98b |
| <i>C4H1</i>     | 0.38 ±0.03d              | 0.91 ±0.04c  | 2.68 ±0.40b   | 3.67 ±0.61b  | 9.57 ±1.20a   | 11.22 ±3.71a |
| <i>4CL1</i>     | 1.00 ±0.09d              | 2.04 ±0.08c  | 7.61 ±1.10b   | 7.13 ±0.57b  | 12.51 ±2.02a  | 16.84 ±2.83a |
| <i>HCT1</i>     | 0.58 ±0.03d              | 0.70 ±0.06d  | 2.53 ±0.54b   | 1.54 ±0.20c  | 3.09 ±0.40b   | 5.42 ±0.60a  |
| <i>HCT2</i>     | 0.19 ±0.02d              | 0.31 ±0.02d  | 2.77 ±0.72a   | 0.85 ±0.09c  | 1.35 ±0.10b   | 2.18 ±0.40ab |
| <i>C3H1</i>     | 0.12 ±0.03e              | 0.21 ±0.03de | 1.24 ±0.06a   | 0.87 ±0.12b  | 0.55 ±0.13c   | 0.46 ±0.03cd |
| <i>C3H2</i>     | nd <sup>z</sup>          | nd           | nd            | 0.01 ±0.00   | nd            | nd           |
| <i>C3H3</i>     | 0.06 ±0.01d              | 0.35 ±0.16b  | 0.92 ±0.26a   | 0.31 ±0.01b  | 0.24 ±0.09bc  | 0.15 ±0.02c  |
| <i>CCoAOMT1</i> | 1.52 ±0.17e              | 3.32 ±0.58d  | 32.73 ±5.28a  | 11.98 ±2.51c | 19.56 ±3.50bc | 21.89 ±4.77b |
| <i>CCoAOMT2</i> | 0.02 ±0.00c              | 0.05 ±0.00c  | 0.03 ±0.00a   | 0.02 ±0.00ab | 0.02 ±0.00c   | 0.02 ±0.00bc |
| <i>CCoAOMT3</i> | 0.72 ±0.04d              | 0.94 ±0.07cd | 6.35 ±1.81a   | 1.24 ±0.13c  | 3.15 ±0.56b   | 5.04 ±1.47ab |
| <i>CCR1</i>     | 11.11 ±0.21a             | 6.64 ±0.36b  | 0.29 ±0.03f   | 1.59 ±0.31c  | 0.78 ±0.02d   | 0.45 ±0.07e  |
| <i>CCR2</i>     | 0.17 ±0.02e              | 1.56 ±0.07d  | 3.77 ±0.78c   | 5.93 ±0.29b  | 8.44 ±0.85a   | 7.82 ±1.09a  |
| <i>CCR3</i>     | 0.03 ±0.00cd             | 0.01 ±0.00e  | 0.02 ±0.00de  | 0.06 ±0.00bc | 0.22 ±0.08ab  | 0.56 ±0.01a  |
| <i>CCR4</i>     | 0.02 ±0.01b              | 0.01 ±0.01b  | 0.01 ±0.00b   | 0.03 ±0.02b  | 0.03 ±0.01b   | 0.12 ±0.00a  |
| <i>CCR5</i>     | 13.49 ±1.10a             | 9.33 ±0.21b  | 0.93 ±0.09d   | 2.76 ±0.66cd | 2.85 ±0.36cd  | 3.54 ±0.63c  |
| <i>CCR6</i>     | nd                       | 0.01 ±0.00d  | 0.03 ±0.00c   | 0.08 ±0.02ab | 0.06 ±0.00b   | 0.11 ±0.01a  |
| <i>F5H1</i>     | 0.44 ±0.13c              | 0.37 ±0.07cd | 4.56 ±0.80a   | 0.80 ±0.09b  | 0.20 ±0.03d   | 0.55 ±0.09bc |
| <i>F5H2</i>     | 0.84 ±0.04e              | 1.39 ±0.04d  | 9.20 ±1.67a   | 6.09 ±0.97ab | 3.38 ±1.05c   | 4.23 ±0.84bc |
| <i>COMT1</i>    | 0.01 ±0.00f              | 1.28 ±0.27c  | 6.06 ±1.16a   | 2.82 ±0.32b  | 0.34 ±0.09d   | 0.16 ±0.02e  |
| <i>COMT2</i>    | 15.51 ±1.13b             | 36.04 ±4.20a | 16.09 ±2.86b  | 31.56 ±4.40a | 14.18 ±1.64b  | 12.63 ±0.67b |
| <i>COMT3</i>    | 0.14 ±0.02c              | 0.21 ±0.02c  | 1.97 ±0.24a   | 0.90 ±0.23b  | 0.87 ±0.10b   | 0.64 ±0.21b  |
| <i>CAD1</i>     | 1.40 ±0.01ab             | 1.00 ±0.03bc | 0.38 ±0.09c   | 0.61 ±0.12c  | 1.81 ±0.23a   | 1.61 ±0.34a  |
| <i>CAD2</i>     | 1.32 ±0.07b              | 2.05 ±0.08a  | 0.16 ±0.00c   | 0.95 ±0.22b  | 2.02 ±0.17a   | 2.55 ±0.29a  |
| <i>CAD3</i>     | 0.84 ±0.10abc            | 1.15 ±0.10ab | 1.36 ±0.37a   | 1.10 ±0.25ab | 0.70 ±0.04bc  | 0.42 ±0.05c  |

<sup>w</sup>Transcript levels in different tissues of cv. Harvest were expressed relative to that of *4CL1* in flag leaf, which was arbitrarily set to value of 1.

<sup>x</sup>Data are means of 2 to 3 independent biological replicates ± SE.

<sup>y</sup>Means followed by different letters within each gene show statistically significant difference at  $P < 0.05$ .

<sup>z</sup>nd, not detected

FB, flag leaf blade; FS, flag leaf sheath; PE, peduncle; IN-1, the first internode; IN-2&3, the second and third internode; IN-4, the fourth internode (see the materials and methods section for numerical designation of internodes).
